# Variance of the SGK1 Gene Is Associated with Insulin Secretion in Different European Populations: Results from the TUEF, EUGENE2, and METSIM Studies

Björn Friedrich<sup>1</sup>\*, Peter Weyrich<sup>1</sup>\*, Alena Stančáková<sup>3</sup>, Jianjung Wang<sup>3</sup>, Johanna Kuusisto<sup>3</sup>, Markku Laakso<sup>3</sup>, Giorgio Sesti<sup>4</sup>, Elena Succurro<sup>4</sup>, Ulf Smith<sup>5</sup>, Torben Hansen<sup>6</sup>, Oluf Pedersen<sup>6,7</sup>, Fausto Machicao<sup>1</sup>, Silke Schäfer<sup>1</sup>, Florian Lang<sup>2</sup>, Teut Risler<sup>1</sup>, Susanne Ullrich<sup>1</sup>, Norbert Stefan<sup>1</sup>, Andreas Fritsche<sup>1\*</sup>, Hans-Ulrich Häring<sup>1</sup>

**1** Department of Internal Medicine, Division of Endocrinology, Diabetology, Vascular Medicine, Nephrology and Clinical Chemistry, University of Tübingen, Tübingen, Germany, **2** Department of Physiology, University of Tübingen, Tübingen, Germany, **3** Department of Medicine, Kuopio University Hospital, Kuopio, Finland, **4** Department of Experimental and Clinical Medicine, Polyclinic Mater Domini, University Magna Graecia of Catanzaro, Catanzaro, Italy, **5** The Lundberg Laboratory for Diabetes Research, Department of Internal Medicine, Sahlgrenska University Hospital, Gothenburg, Sweden, **6** The Steno Diabetes Center, Copenhagen, Denmark, **7** Faculty of Health Science, University of Copenhagen, Copenhagen, Denmark

## Abstract

**Hypothesis:** Serum- and Glucocorticoid-inducible Kinase 1 (SGK1) is involved in the regulation of insulin secretion and may represent a candidate gene for the development of type 2 diabetes mellitus in humans.

**Methods:** Three independent European populations were analyzed for the association of SGK1 gene (*SGK*) variations and insulin secretion traits. The German TUEF project provided the screening population (N=725), and four tagging SNPs (rs1763527, rs1743966, rs1057293, rs9402571) were investigated. EUGENE2 (N=827) served as a replication cohort for the detected associations. Finally, the detected associations were validated in the METSIM study, providing 3798 non-diabetic and 659 diabetic (type 2) individuals.

**Results:** Carriers of the minor G allele in rs9402571 had significantly higher C-peptide levels in the 2 h OGTT (+10.8%,  $p=0.04$ ; dominant model) and higher  $AUC_{C-peptide}/AUC_{Glc}$  ratios (+7.5%,  $p=0.04$ ) compared to homozygous wild type TT carriers in the screening population. As interaction analysis for BMI  $\times$  rs9402571 was significant ( $p=0.04$ ) for the endpoint insulin secretion, we stratified the TUEF cohort for BMI, using a cut off point of BMI = 25. The effect on insulin secretion only remained significant in lean TUEF participants (BMI  $\leq$  25). This finding was replicated in lean EUGENE2 rs9402571 minor allele carriers, who had a significantly higher  $AUC_{Ins}/AUC_{Glc}$  (TT:  $226 \pm 7$ , XG:  $246 \pm 9$ ;  $p=0.019$ ). Accordingly, the METSIM trial revealed a lower prevalence of type 2 diabetes (OR: 0.85; 95%CI: 0.71–1.01;  $p=0.065$ , dominant model) in rs9402571 minor allele carriers.

**Conclusions:** The rs9402571 *SGK* genotype associates with increased insulin secretion in lean non-diabetic TUEF/EUGENE2 participants and with lower diabetes prevalence in METSIM. Our study in three independent European populations supports the conclusion that *SGK* variability affects diabetes risk.

**Citation:** Friedrich B, Weyrich P, Stančáková A, Wang J, Kuusisto J, et al. (2008) Variance of the SGK1 Gene Is Associated with Insulin Secretion in Different European Populations: Results from the TUEF, EUGENE2, and METSIM Studies. PLoS ONE 3(11): e3506. doi:10.1371/journal.pone.0003506

**Editor:** Adrian Vella, Mayo Clinic College of Medicine, United States of America

**Received:** July 18, 2008; **Accepted:** September 27, 2008; **Published:** November 5, 2008

**Copyright:** © 2008 Friedrich et al. This is an open-access article distributed under the terms of the Creative Commons Attribution License, which permits unrestricted use, distribution, and reproduction in any medium, provided the original author and source are credited.

**Funding:** The study was supported by grants from the Deutsche Forschungsgemeinschaft (KFO 114, Heisenberg-Grant to NS: STE 1096/1-1), the European Community's FP6 EUGENE2 (LSHM-CT-2004-512013) and by an intramural grant from the Medical Faculty of the University of Tübingen (Fortüne Program Nr. 1212-0-0 to BF).

**Competing Interests:** The authors have declared that no competing interests exist.

\* E-mail: andreas.fritsche@med.uni-tuebingen.de

† These authors contributed equally to this work.

## Introduction

Type 2 diabetes arises when insulin resistance cannot be compensated for with increased insulin secretion owing to a gradual loss of pancreatic beta-cell function [1]. Recently, genome-wide association studies have been undertaken to further investigate the genetic background of type 2 diabetes, revealing that many high risk alleles are located within genes that are linked

to beta cell function, including TCF7L2 [2,3,4], CDKAL1 [5,6,7,8], SLC30A8 [5,9,10], IGF2BP2 [5], HHEX/IDE [6,9,11,12], and CDKN2A/B [13]. Our study therefore focuses on genes that play a role in insulin secretion, using a classical candidate-gene approach.

One interesting candidate for the regulation of insulin secretory function is the serum and glucocorticoid inducible kinase SGK1, which is a ubiquitously expressed serine-threonine kinase in

humans that is encoded by the gene *SGK* on chromosome 6q23. SGK1 was originally identified in rodents as a serum and glucocorticoid regulated kinase [14], and was shown to be up-regulated by mineralocorticoids [15], TGF- $\beta$ 1, and insulin [16]. SGK1 seems to provide an important molecular link between salt and glucose homeostasis, as SGK1<sup>-/-</sup> knockout mice fed with high-salted chow demonstrated decreased SGK1-dependent cellular glucose uptake [17]. Beyond SGK1 functions in transmembranous glucose transport [18,19,20,21] and insulin signalling [16], SGK1 also plays a role in insulin secretion. In INS-1 cells, *SGK* gene transcription and protein expression is strongly regulated, and SGK1 up-regulates the activity of voltage-gated K<sup>+</sup> channels, which in turn reduces Ca<sup>++</sup> influx and inhibits insulin release [22]. Another SGK1-dependent molecular mechanism in insulin secretion is the activation of Na<sup>+</sup>/K<sup>+</sup>-ATPase during plasma membrane repolarisation [23].

Taken together, compelling evidence points to a role of this ubiquitously expressed serine/threonine kinase SGK1 in glucose metabolism, especially in the regulation of insulin secretion. So far, studies on the role of *SGK* genetic variance in human physiology are rather limited. Two studies confirmed an association of *SGK* variability with blood pressure in a German twin population [24] and the cohort of the Scandinavian Malmo Diet and Cancer Study [25]. We conducted our study on *SGK* genetic variance and potential associations with insulin secretory function in the German TUEF cohort and the EUGENE2 consortium (Denmark, Finland, Germany, Italy, and Sweden), as these two European diabetes risk populations were extensively phenotyped for insulin secretion traits at the prediabetic stage. To confirm the relevance of associations found for later onset of type 2 diabetes mellitus, corresponding *SGK* risk alleles were further investigated in the METSIM Trial, which provides a large population-based Finnish cohort for the endpoint diabetes. Analyzing four selected tagging SNPs of *SGK*, the SNP rs9402571 was consistently found to be associated with altered insulin secretion in both prediabetic populations, and was further confirmed to associate with the prevalence of type 2 diabetes mellitus in the population-based cohort.

## Methods

### Participants

Three independent European cohorts were analyzed for *SGK* genetic variance and insulin secretion traits for this study. The TUEF project provided the screening population, while EUGENE2 served as a replication cohort for insulin secretion traits. METSIM is a population-based cohort providing both non-diabetic and type 2 diabetic individuals, and was employed for estimation of *SGK* diabetes-risk alleles. Further details on each of the three study cohorts are provided in the following, with baseline characteristics presented in Table 1.

**TUEF cohort.** The TUEF (Tuebingen Family Study) cohort includes non-diabetic individuals from southern Germany with increased risks for developing type 2 diabetes (family history of type 2 diabetes, diagnosis of impaired fasting glucose). The study protocol included standard procedures as medical history, physical examination, routine blood tests and oral glucose tolerance test with blood sampling (plasma insulin, plasma glucose, plasma C-peptide) at 0, 30, 60, 90 and 120 min [26]. Informed written consent was obtained from all participants, and all study procedures were approved by the local medical ethic research committee of the Faculty of Medicine at the University of Tuebingen. 1000 TUEF participants were genotyped for *SGK* and phenotyped by OGTT and AUC<sub>CP</sub>/AUC<sub>Glc</sub> (see below). For

**Table 1.** Characteristics of the 3 investigated study populations.

|              | TUEF <sup>a</sup><br>(N = 725) | EUGENE2 <sup>b</sup><br>(N = 827) | METSIM <sup>c</sup><br>(N = 4457) |
|--------------|--------------------------------|-----------------------------------|-----------------------------------|
| Gender (m/f) | 261/464                        | 344/483                           | 4457/-                            |
| Age (years)  | 37.2±12.5                      | 40.1±10.3                         | 59.5±5.9                          |
| BMI          | 29.3±8.8                       | 26.6±5.0                          | 27.4±4.2                          |
| Waist (cm)   | 93.9±18.4                      | 89.0±13.4                         | 99.1±11.5                         |

Data are presented as means±SD.

<sup>a</sup>Tuebingen Family Study (South Germany; non-diabetic individuals).

<sup>b</sup>Finns, Danish, Dutch, Swedish and Germans from the EUGENE2 consortium [27]. Only non-diabetic EUGENE2 participants with complete datasets for AUC<sub>ins</sub>/AUC<sub>gluc</sub> calculations were analyzed.

<sup>c</sup>METabolic Syndrome In Men (METSIM) cohort from Kuopio (Finland), population-based (non-diabetic and diabetic individuals).

doi:10.1371/journal.pone.0003506.t001

further investigation, individuals with one of the following criteria were excluded: taking medications known to affect glucose tolerance, severe diseases (malignancies, cardiovascular or psychiatric disease, etc.), newly diagnosed diabetes, positive GAD antibodies, and one or more missing parameters needed for AUC<sub>CP</sub>/AUC<sub>Glc</sub> calculation. This method of elimination resulted in a final study cohort of 725 non-diabetic individuals.

**EUGENE2 consortium.** Five different European clinical diabetes centres contributed non-diabetic offspring of patients with type 2 diabetes to the EUGENE2 (European network on Functional Genomics of Type 2 Diabetes) consortium, including the Lundberg Laboratory for Diabetes Research (Göteborg, Sweden), the Polyclinic Mater Domini of the University Magna Graecia (Catanzaro, Italy), the Steno Diabetes Center (Copenhagen, Denmark), the Kuopio University Hospital (Kuopio, Finland), and the Tübingen University Hospital (Tübingen, Germany). All study participants underwent a standard medical history, routine laboratory testing, assessment of social issues (alcohol consumption, activity, smoking status), and an OGTT. Informed written consent was obtained of all participants, and the local ethics committees approved the study protocol at the different centres. Further details about the EUGENE2 consortium are provided elsewhere [27].

**METSIM cohort.** The Finnish cohort comprised 4457 male participants, aged from 50 to 70 years. Among them, 43.4% had a family history of diabetes. The primary aim of the ongoing METSIM (METabolic Syndrome In Men) trial is to investigate the effects of SNPs in genes of interest on the risk of type 2 diabetes and cardiovascular disease in a random sample of Finnish men, living in the town of Kuopio (population 95,000), in eastern Finland [4]. The WHO criteria in 1999 for diabetes mellitus were used for classification of the METSIM participants, based on fasting plasma glucose and 2-hour post-load glucose levels in an OGTT [28] conducted at baseline. Among the 4457 participants, 659 had known or newly diagnosed diabetes and 3798 were non-diabetic. The protocol includes a 1-day visit to the Clinical Research Unit of the University of Kuopio. This study was approved by the Ethics Committee of the University of Kuopio and was in accordance with the Helsinki Declaration.

### Body composition and body fat distribution

Body mass index (BMI) was calculated as weight divided by the square of height (kg/m<sup>2</sup>). Waist and hip circumferences were measured in the upright position.

## Analytical procedures

Blood glucose was determined using a bedside glucose analyzer (Yellow Springs Instruments, Yellow Springs, CO, USA). Plasma insulin was determined by microparticle enzyme immunoassay (Abbott Laboratories, Tokyo, Japan) for both the TUEF and EUGENE2 cohorts. Plasma C-peptide was determined by radioimmunoassay (Byk-Sangtec, Dietzenbach, Germany).

## Oral glucose tolerance test (OGTT)

The OGTT was performed according to the recommendations of the World Health Organization after a 12 h fasting period [28]. Blood glucose, insulin (all centres), and C-peptide (TUEF cohort only) plasma levels were determined at 0, 30, 60, 90, and 120 min.

## Insulin sensitivity and insulin secretion

Insulin sensitivity was calculated from glucose and insulin values obtained during the OGTT, as proposed by Matsuda and DeFronzo [29]. Estimation of insulin secretion by the OGTT parameters was obtained by C-peptide levels measured at 30 min during the OGTT. Alternatively, insulin secretory function was calculated by the ratio of the area under the curve (AUC) of C-peptide ( $AUC_{CP}$ ; TUEF cohort) or insulin ( $AUC_{Ins}$ ; EUGENE2 cohort) plasma levels, referred to as the AUC of plasma glucose ( $AUC_{Glc}$ ), using the trapezoidal approximation rule for AUC calculation [30].

## SNP Genotyping

The *SGK* (NM\_005627) gene on chromosome 6q23 was subjected to Hap Map analysis in the CEU population (Utah residents with ancestry from Northern and Western Europe; data release 21a/Jan07). Tagging SNPs were selected using the TagSNP Picker software (settings: multimarker mode  $MAF > 0.05$ ,  $r^2 > 0.9$ ), screening the complete *SGK* gene, 10 kb of the promoter, and 1.5 kb downstream of the 3' untranslated region. Genotyping of tagging SNPs was accomplished by means of the TaqMan<sup>®</sup> assay and an ABI Prism 7500 sequence detection system (Applied Biosystems, Foster City, CA, USA). Genotyping quality was tested by including three known controls of each genotype in each assay.

## Data Analysis

Unless otherwise noted, data are stated as means  $\pm$  SEM. Comparison between genotype groups was performed using logarithmically transformed data for non-normally distributed parameters in ANOVA and *t*-tests. Each effect was adjusted for relevant covariates using mixed linear models. Parameters that remained non-normally distributed despite log transformation were directly analyzed by a non-parametric (Wilcoxon) test. Association with diabetes (METSIM) was tested using logistic regression analysis. Hardy-Weinberg equilibrium was tested with the  $\chi^2$  test. A *p*-value  $\leq 0.05$  was considered to be statistically significant. The software package JMP (SAS Institute Inc, Cary, NC, USA) and SPSS 14.0 for Windows (SPSS Inc., Chicago, IL, USA) were used for statistical data analysis. The software JLIN (Western Australian Institute for Medical Research) was used for calculation of linkage disequilibrium [31].

## Results

### Genetic analysis of the human *SGK* gene

The human *SGK* gene comprises 12 exons spanning 5.6 kb on chr6q23. Analysis of a 17 kb region of the *SGK* locus by Tag SNP Picker revealed five tagSNPs in the HapMap, each with a minor

allele frequency (MAF) of  $> 0.05$  in the CEU population. Four SNPs (rs1763527, rs1743966, rs1057293, and rs9402571) were finally selected for genotyping, covering 83% of all SNPs fulfilling the inclusion criteria mentioned above. Both rs1743966 (intron 6) and rs1057293 (exon 8; synonymous: Asp/Asp) are located within the *SGK* gene, while rs1763527 (promoter) and rs9402571 (1429 bp downstream of the *SGK* 3'UTR) tag the regions surrounding *SGK*. MAF and Hardy-Weinberg-Equilibrium test results of all tagging SNPs are indicated for the TUEF and EUGENE2 cohort in Fig. 1A, with linkage disequilibrium (LD) analysis provided in Fig. 1B.

### SGK association analyses in the TUEF screening cohort

There was no association between genotypes, anthropometrics, and insulin sensitivity in the south German screening cohort, which was investigated for all four tagging SNPs (data not shown). Most consistently, two different indices of insulin secretion differed significantly among rs9402571 genotypes (Table 2). Minor allele carriers of rs9402571 had significantly higher C-Peptide levels in the 2 h OGTT than individuals with the wild type allele (+10.8%,  $p = 0.04$ , dominant model), after adjustment for age, gender, BMI, and insulin sensitivity. This genotype also associated with better  $AUC_{C-Peptide}/AUC_{Glc}$  ratios (+7.5%,  $p = 0.04$ ; dominant model, adjusted for age, BMI and gender; Table 2).

### Interaction analysis and replication in EUGENE2

An interaction analysis for the trait of insulin secretion was performed. BMI  $\times$  rs9402571 genotype was revealed to be significantly relevant for the endpoint insulin secretion in TUEF, independent of which calculation model for insulin secretion was used ( $p = 0.04$ , both models) and of whether BMI was treated as a continuous or discrete variable with BMI cut-off points ranging from 24 to 28 kg/m<sup>2</sup>. We therefore stratified the cohort for BMI, using a cut off point of BMI = 25 to distinguish lean from overweight or obese individuals, and did a reanalysis for insulin secretion for both subgroups. The effect on  $AUC_{CP}/AUC_{Glc}$  was only significant in the lean TUEF subgroup (BMI  $\leq 25$ ; *TT*:  $318 \pm 5$ , *TG*:  $335 \pm 7$ , *GG*:  $342 \pm 17$ ;  $p = 0.031$ ; dominant model, adjusted for age, gender, and insulin sensitivity; Fig. 2A), while there was no association with insulin secretory function in overweight to obese study participants (BMI  $> 25$ ;  $p > 0.24$ , all; additive and dominant models; data not shown). To replicate our findings of the association between rs9402571 and insulin secretion, the EUGENE2 cohort was genotyped for rs9402571 and the  $AUC_{Ins}/AUC_{Glc}$  ratio was calculated for each genotype. Again,  $AUC_{Ins}/AUC_{Glc}$  was significantly higher (*TT*:  $226 \pm 7$ , *TG*:  $239 \pm 9$ , *GG*:  $289 \pm 33$ ;  $p = 0.019$  for the dominant model; adjusted for study centre, familial relationship, age, gender, and insulin sensitivity; Fig. 2B) in lean (BMI  $\leq 25$ ) minor allele carriers of rs9402571, while there was no significant association in overweight to obese individuals (BMI  $> 25$ ;  $p > 0.44$ ; data not shown).

### Diabetes risk analysis in the METSIM population-based cohort

The METSIM cohort was genotyped for all four selected tagging SNPs to analyze *SGK* genetic variance for the endpoint diabetes (type 2) in a population-based cohort. The minor allele of rs9402571, which was found to associate with a higher insulin secretion in the screening (TUEF) as well as the replication (EUGENE2) populations, associated almost significantly ( $p = 0.065$ ; adjusted for age, family history of diabetes, and BMI) with a lower prevalence of type 2 diabetes (odds ratio: 0.845; 95%CI: 0.706–1.011), comparing the 659 diabetic patients with

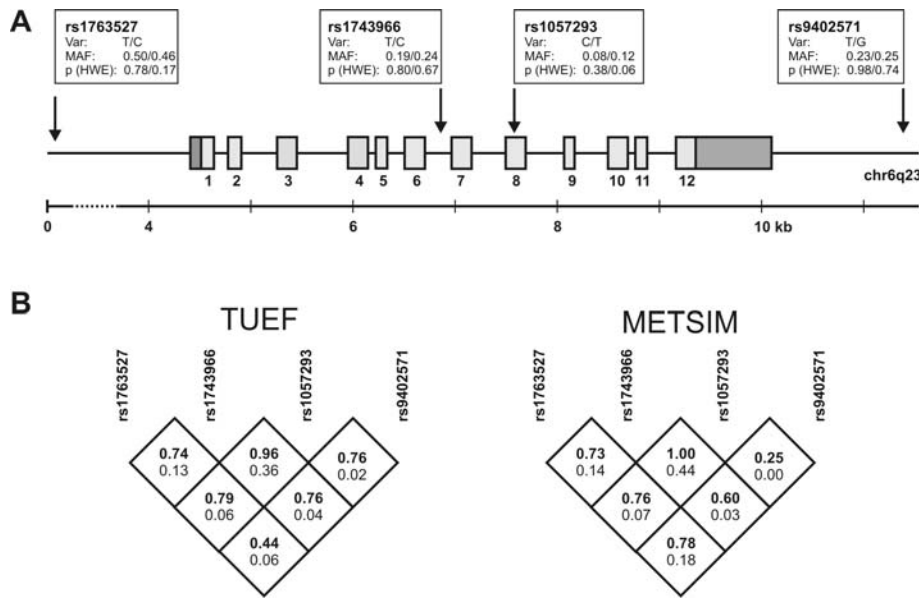

**Figure 1. The gene encoding human serum- and glucocorticoid-regulated kinase 1 (SGK) on chromosome 6q23.** A) Exons (light grey) and untranslated regions (dark grey) are indicated. Four tagging SNPs were selected by HapMap analysis considering the SGK gene ±10 kb upstream of the first translational start codon and 1.5 kb downstream of the 3' untranslated region. SNP information is provided in boxes (var=variation; MAF=minor allele frequency; HWE=Hardy-Weinberg equilibrium,  $\chi^2$  test) for populations investigated for all tagging SNPs (South German TUEF cohort/Finnish METSIM cohort). B) Linkage disequilibrium analysis of selected tagging SNPs for the TUEF and METSIM population: D' (in bold, upper numeral) and  $r^2$  (bottom numeral).  
doi:10.1371/journal.pone.0003506.g001

the non-diabetic 3798 METSIM participants. In contrast, there was no significantly altered odds ratio in regard to the three other genotyped SGK tagging SNPs rs1763527, rs1743966, and rs1057293 (Fig. 3).

**Discussion**

This is the first study to investigate the role of SGK (Serum- and Glucocorticoid-inducible Kinase 1) genetic variance in two independent prediabetic diabetes risk populations (TUEF and EUGENE2), including a confirmatory analysis in a third independent, older population that includes both diabetic and

non-diabetic individuals (METSIM). SGK is an attractive candidate gene for type 2 diabetes mellitus onset in humans, as SGK1 exerts pleiotropic effects on glucose metabolism and insulin secretion in various cellular and animal models [16,22,23].

In the screening population (TUEF; N=725), we found a significant association of rs9402571 with glucose-induced insulin secretion in various estimation models based on oral glucose tolerance testing. This association was reproducible in a subgroup that was additionally phenotyped by an intravenous glucose tolerance test (data not shown). After confirming a significant interaction between BMI and rs9402571 for the endpoint insulin secretion, BMI stratification (BMI cut off: 25) was introduced in

**Table 2. Metabolic Traits of the German Cohort according to rs9402571 genotype.**

| SNP Genotype                                                               | rs9402571 |           |           | p <sub>1</sub>    | p <sub>2</sub> |
|----------------------------------------------------------------------------|-----------|-----------|-----------|-------------------|----------------|
|                                                                            | TT        | TG        | GG        |                   |                |
| N                                                                          | 434       | 251       | 40        | -                 | -              |
| Age (y)                                                                    | 37.0±0.6  | 37.1±0.8  | 39.6±2.2  | 0.44              | 0.62           |
| BMI (kg/m <sup>2</sup> )                                                   | 29.0±0.4  | 30.0±0.6  | 28.9±1.3  | 0.24 <sup>a</sup> | 0.20           |
| Fasting glucose (mM)                                                       | 5.10±0.03 | 5.05±0.04 | 5.08±0.09 | 0.10 <sup>b</sup> | <b>0.0376</b>  |
| Glucose, 120 min OGTT (mM)                                                 | 6.19±0.08 | 6.11±0.11 | 6.33±0.29 | 0.31 <sup>b</sup> | 0.16           |
| Insulin sensitivity, OGTT (U)                                              | 17.1±0.5  | 16.9±0.8  | 14.1±1.4  | 0.12 <sup>b</sup> | 0.64           |
| C-Peptide, 30 min OGTT (pM)                                                | 2020±43   | 2153±60   | 2239±158  | 0.12 <sup>c</sup> | <b>0.0398</b>  |
| AUC <sub>C-peptide</sub> /AUC <sub>glucose</sub> OGTT (·10 <sup>-9</sup> ) | 318±5     | 335±7     | 342±18    | 0.09 <sup>b</sup> | <b>0.0416</b>  |

Data are given as means±SEM; p<sub>1</sub>-additive model; p<sub>2</sub>-dominant model. AUC-area under the curve; OGTT-oral glucose tolerance test; SNP-single nucleotide polymorphism.

<sup>a</sup>adjusted for age and gender.

<sup>b</sup>adjusted for age, gender and BMI.

<sup>c</sup>adjusted for age, gender, BMI and insulin sensitivity.

doi:10.1371/journal.pone.0003506.t002

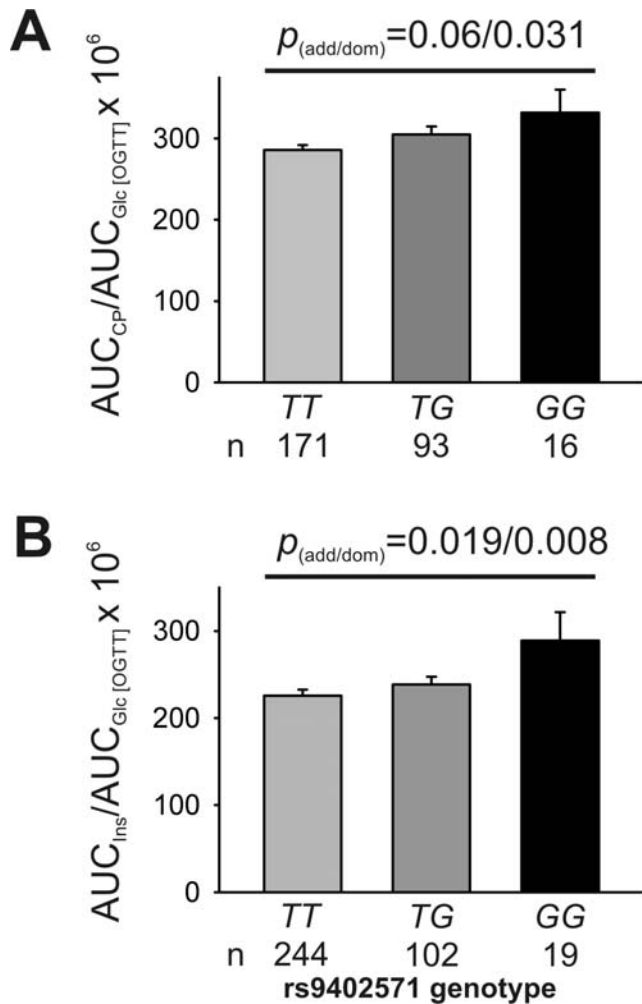

**Figure 2. Insulin secretion of the TUEF and EuGene2 Cohort, according to rs9402571 genotype in lean subjects (BMI < 25).** A) TUEF cohort: The ratio of the area under the curve (AUC) of C-Peptide values ( $AUC_{Cp}$ ) to AUC glucose ( $AUC_{Glc}$ ) in the OGTT was adjusted for age, gender and insulin sensitivity (Matsuda). B) EUGENE2 cohort: the ratio of AUC insulin ( $AUC_{Ins}$ ) to AUC glucose ( $AUC_{Glc}$ ) was adjusted for centre, familial relationship, age, gender and insulin sensitivity. Only individuals with a BMI < 25 kg/m<sup>2</sup> were included for both analysis. Data are presented as means  $\pm$  SEM. p-values are shown for both the additive and dominant model.

doi:10.1371/journal.pone.0003506.g002

our analysis, revealing that only lean individuals were affected by the rs9402571 minor allele. This genotype-phenotype association was also restricted to lean individuals in the replication cohort from the EUGENE2 consortium (N = 827), comprising individuals from Sweden, Italy, Denmark, Finland, and Germany. Interestingly, the rs9402571 allele that associates with higher insulin secretion in TUEF and EUGENE2 accordingly associates with lower diabetes prevalence in the METSIM trial. Despite the fact

## References

- Weyer C, Bogardus C, Mott DM, Pratley RE (1999) The natural history of insulin secretory dysfunction and insulin resistance in the pathogenesis of type 2 diabetes mellitus. *J Clin Invest* 104: 787–794.
- Shu L, Sauter NS, Schulthess FT, Matveyenko AV, Oberholzer J, et al. (2008) Transcription factor 7-like 2 regulates beta-cell survival and function in human pancreatic islets. *Diabetes* 57: 645–653.
- Schafer SA, Tschritter O, Machicao F, Thamer C, Stefan N, et al. (2007) Impaired glucagon-like peptide-1-induced insulin secretion in carriers of

| SNP       | Statistics for each SNP |             |             |           | Odds ratio and 95% CI for minor alleles |
|-----------|-------------------------|-------------|-------------|-----------|-----------------------------------------|
|           | Odds ratio              | Lower limit | Upper limit | $P_{dom}$ |                                         |
| rs1763527 | 0.910                   | 0.749       | 1.106       | 0.343     |                                         |
| rs1743966 | 1.031                   | 0.862       | 1.233       | 0.741     |                                         |
| rs1057293 | 0.997                   | 0.807       | 1.233       | 0.979     |                                         |
| rs9402571 | 0.845                   | 0.706       | 1.011       | 0.065     |                                         |

**Figure 3. Diabetes risk (METSIM study) according to SGK genetic variability.** The odds ratio, 95% confidence intervals (CI) and forest plot for the endpoint “type 2 diabetes” are presented for the minor alleles of each SGK tagging SNP. N = 658 diabetic and N = 3746 non-diabetic subjects of the Finish METSIM study cohort were investigated. The p-values were calculated for a dominant model. SNP = single nucleotide polymorphism. doi:10.1371/journal.pone.0003506.g003

that SGK1 has a regulatory function for glucose transporter expression and translocation [18,20,21], no association of the four investigated SGK tagging SNPs with insulin sensitivity was found in the TUEF screening population or in the EUGENE2 study. One could suggest that the SGK rs9402571 SNP was not detected in the genome-wide association (GWA) studies due to its dependence on BMI, as the GWA analyses did not stratify for BMI. Interestingly, a genome-wide linkage analysis identified the gene locus 6q23, which also includes SGK, to be associated with BMI progression in participants of the Framingham Heart Study [32].

The increase in insulin secretion reported here (10.8% in TUEF; 8.8% in EUGENE2) within lean rs9402571 G allele carriers was remarkable compared to wild type genotype, and may indicate a protective genotype against type 2 diabetes. This protective rs9402571 SGK genotype may become blurred in overweight or obese individuals, as environmental factors may dominate compared to the SGK genotype. However, our analysis in the METSIM trial assumed that the protective rs9402571 SGK genotype effect obviously persists even in a population-based cohort containing individuals 20 years older than those from the TUEF and EUGENE2 studies. Therefore, although the number of study participants was limited after BMI stratification in both TUEF and EUGENE2, our findings in three independent European populations allow the assumption that the SGK rs9402571 genotype is protective against type 2 diabetes. Further studies on the role of SGK1 in human insulin secretion and diabetes onset are therefore needed.

## Acknowledgments

The authors acknowledge the excellent technical assistance of Melanie Weisser, Alke Guirguis, Roman Werner, Heike Luz, and Anna Bury.

## Author Contributions

Conceived and designed the experiments: ML GS US TH OP FM NS AF HUH. Performed the experiments: AS JW JK ES OP SAS. Analyzed the data: BF PW AS JW JK ML GS ES US TH OP FM FL TR SU NS AF HUH. Contributed reagents/materials/analysis tools: FM HUH. Wrote the paper: BF PW AF.

transcription factor 7-like 2 (TCF7L2) gene polymorphisms. *Diabetologia* 50: 2443–2450.

- Wang J, Kuusisto J, Vantinen M, Kuulasmaa T, Lindstrom J, et al. (2007) Variants of transcription factor 7-like 2 (TCF7L2) gene predict conversion to type 2 diabetes in the Finnish Diabetes Prevention Study and are associated with impaired glucose regulation and impaired insulin secretion. *Diabetologia* 50: 1192–1200.
- Palmer ND, Goodarzi MO, Langefeld CD, Ziegler J, Norris JM, et al. (2008) Quantitative trait analysis of type 2 diabetes susceptibility loci identified from

- whole genome association studies in the Insulin Resistance Atherosclerosis Family Study. *Diabetes* 57: 1093–1100.
6. Pascoe L, Tura A, Patel SK, Ibrahim IM, Ferrannini E, et al. (2007) Common variants of the novel type 2 diabetes genes CDKAL1 and HHEX/IDE are associated with decreased pancreatic beta-cell function. *Diabetes* 56: 3101–3104.
  7. Steinthorsdottir V, Thorleifsson G, Reynisdottir I, Benediktsson R, Jonsdottir T, et al. (2007) A variant in CDKAL1 influences insulin response and risk of type 2 diabetes. *Nat Genet* 39: 770–775.
  8. Stancakova A, Pihlajamaki J, Kuusisto J, Stefan N, Fritsche A, et al. (2008) Single-nucleotide polymorphism rs7754840 of CDKAL1 is associated with impaired insulin secretion in nondiabetic offspring of type 2 diabetic subjects and in a large sample of men with normal glucose tolerance. *J Clin Endocrinol Metab* 93: 1924–1930.
  9. Staiger H, Machicao F, Stefan N, Tschritter O, Thamer C, et al. (2007) Polymorphisms within novel risk loci for type 2 diabetes determine beta-cell function. *PLoS ONE* 2: e832.
  10. Boesgaard TW, Zilinskaite J, Vantinen M, Laakso M, Jansson PA, et al. (2008) The common SLC30A8 Arg325Trp variant is associated with reduced first-phase insulin release in 846 non-diabetic offspring of type 2 diabetes patients—the EUGENE2 study. *Diabetologia* 51: 816–820.
  11. Grarup N, Andersen G (2007) Gene-environment interactions in the pathogenesis of type 2 diabetes and metabolism. *Curr Opin Clin Nutr Metab Care* 10: 420–426.
  12. Staiger H, Stancakova A, Zilinskaite J, Vantinen M, Hansen T, et al. (2008) A candidate type 2 diabetes polymorphism near the HHEX locus affects acute glucose-stimulated insulin release in European populations: results from the EUGENE2 study. *Diabetes* 57: 514–517.
  13. Grarup N, Rose CS, Andersson EA, Andersen G, Nielsen AL, et al. (2007) Studies of association of variants near the HHEX, CDKN2A/B, and IGF2BP2 genes with type 2 diabetes and impaired insulin release in 10,705 Danish subjects: validation and extension of genome-wide association studies. *Diabetes* 56: 3105–3111.
  14. Webster MK, Goya L, Ge Y, Maiyar AC, Firestone GL (1993) Characterization of *sgk*, a novel member of the serine/threonine protein kinase gene family which is transcriptionally induced by glucocorticoids and serum. *Mol Cell Biol* 13: 2031–2040.
  15. Chen SY, Bhargava A, Mastroberardino L, Meijer OC, Wang J, et al. (1999) Epithelial sodium channel regulated by aldosterone-induced protein *sgk*. *Proc Natl Acad Sci U S A* 96: 2514–2519.
  16. Lang F, Bohmer C, Palmada M, Seebohm G, Strutz-Seebohm N, et al. (2006) (Patho)physiological significance of the serum- and glucocorticoid-inducible kinase isoforms. *Physiol Rev* 86: 1151–1178.
  17. Boini KM, Hennige AM, Huang DY, Friedrich B, Palmada M, et al. (2006) Serum- and glucocorticoid-inducible kinase 1 mediates salt sensitivity of glucose tolerance. *Diabetes* 55: 2059–2066.
  18. Dieter M, Palmada M, Rajamanickam J, Aydin A, Busjahn A, et al. (2004) Regulation of glucose transporter SGLT1 by ubiquitin ligase Nedd4-2 and kinases SGK1, SGK3, and PKB. *Obes Res* 12: 862–870.
  19. Grahammer F, Henke G, Sandu C, Rexhepaj R, Hussain A, et al. (2006) Intestinal function of gene-targeted mice lacking serum- and glucocorticoid-inducible kinase 1. *Am J Physiol Gastrointest Liver Physiol* 290: G1114–G1123.
  20. Palmada M, Boehmer C, Akel A, Rajamanickam J, Jeyaraj S, et al. (2006) SGK1 kinase upregulates GLUT1 activity and plasma membrane expression. *Diabetes* 55: 421–427.
  21. Jeyaraj S, Boehmer C, Lang F, Palmada M (2007) Role of SGK1 kinase in regulating glucose transport via glucose transporter GLUT4. *Biochem Biophys Res Commun* 356: 629–635.
  22. Ullrich S, Berchtold S, Ranta F, Seebohm G, Henke G, et al. (2005) Serum- and glucocorticoid-inducible kinase 1 (SGK1) mediates glucocorticoid-induced inhibition of insulin secretion. *Diabetes* 54: 1090–1099.
  23. Ullrich S, Zhang Y, Avram D, Ranta F, Kuhl D, et al. (2007) Dexamethasone increases Na<sup>+</sup>/K<sup>+</sup> ATPase activity in insulin secreting cells through SGK1. *Biochem Biophys Res Commun* 352: 662–667.
  24. Busjahn A, Aydin A, Uhlmann R, Krasko C, Bahring S, et al. (2002) Serum- and glucocorticoid-regulated kinase (SGK1) gene and blood pressure. *Hypertension* 40: 256–260.
  25. von Wövern F, Berglund G, Carlson J, Mansson H, Hedblad B, et al. (2005) Genetic variance of SGK-1 is associated with blood pressure, blood pressure change over time and strength of the insulin-diastolic blood pressure relationship. *Kidney Int* 68: 2164–2172.
  26. Thamer C, Stumvoll M, Niess A, Tschritter O, Haap M, et al. (2003) Reduced skeletal muscle oxygen uptake and reduced beta-cell function: two early abnormalities in normal glucose-tolerant offspring of patients with type 2 diabetes. *Diabetes Care* 26: 2126–2132.
  27. Laakso M, Zilinskaite J, Hansen T, Boesgaard TW, Vantinen M, et al. (2008) Insulin sensitivity, insulin release and glucagon-like peptide-1 levels in persons with impaired fasting glucose and/or impaired glucose tolerance in the EUGENE2 study. *Diabetologia* 51: 502–511.
  28. Alberti KG, Zimmet PZ (1998) Definition, diagnosis and classification of diabetes mellitus and its complications. Part 1: diagnosis and classification of diabetes mellitus provisional report of a WHO consultation. *Diabet Med* 15: 539–553.
  29. Matsuda M, DeFronzo RA (1999) Insulin sensitivity indices obtained from oral glucose tolerance testing: comparison with the euglycemic insulin clamp. *Diabetes Care* 22: 1462–1470.
  30. Utzschneider KM, Prigeon RL, Tong J, Gerchman F, Carr DB, et al. (2007) Within-subject variability of measures of beta cell function derived from a 2 h OGTT: implications for research studies. *Diabetologia* 50: 2516–2525.
  31. Carter KW, McCaskie PA, Palmer IJ (2006) JLIN: a java based linkage disequilibrium plotter. *BMC Bioinformatics* 7: 60.
  32. Atwood LD, Heard-Costa NL, Cupples LA, Jaquish CE, Wilson PW, et al. (2002) Genomewide linkage analysis of body mass index across 28 years of the Framingham Heart Study. *Am J Hum Genet* 71: 1044–1050.
